# Supplementary material for: Exploring architectures displaying multimeric presentations of a trihydroxypiperidine iminosugar
Source: publisher site journal article supplement (doi:10.3762/bjoc.11.282), 2015-12-16
Supplement: Additional file 1 [file 1860-5397-11-282-S1.pdf]

**Supporting Information**  
**for**  
**Exploring architectures displaying multimeric presentations of a trihydroxypiperidine iminosugar**

Camilla Matassini<sup>1</sup>, Stefania Mirabella<sup>1</sup>, Andrea Goti<sup>1</sup>, Inmaculada Robina<sup>2</sup>, Antonio J. Moreno-Vargas<sup>2</sup> and Francesca Cardona<sup>\*,1</sup>

Address: <sup>1</sup>Dipartimento di Chimica "Ugo Schiff", Università di Firenze, Via della Lastruccia 3-13, 50019 Sesto Fiorentino (FI), Italy and <sup>2</sup>Departamento de Química Orgánica, Facultad de Química, Universidad de Sevilla, c/ Prof. García González 1, E-41012, Sevilla, Spain.

Email: Francesca Cardona - francesca.cardona@unifi.it

\*Corresponding author

**Characterization data, <sup>1</sup>H NMR and <sup>13</sup>C NMR spectra of synthesized compounds and IC<sub>50</sub> graphics of compounds 11·HCl and 15**

## Table of contents

|                                                                              |     |
|------------------------------------------------------------------------------|-----|
| Figure S1. $^1\text{H}$ NMR spectrum of compound <b>7</b>                    | S3  |
| Figure S2. $^{13}\text{C}$ NMR spectra of compound <b>7</b>                  | S4  |
| Figure S3. $^1\text{H}$ NMR spectrum of compound <b>9</b>                    | S5  |
| Figure S4. $^{13}\text{C}$ NMR spectra of compound <b>9</b>                  | S6  |
| Figure S5. $^1\text{H}$ NMR spectrum of compound <b>8</b>                    | S7  |
| Figure S6. $^{13}\text{C}$ NMR spectra of compound <b>8</b>                  | S8  |
| Figure S7. $^1\text{H}$ NMR spectrum of compound <b>11</b>                   | S9  |
| Figure S8. $^{13}\text{C}$ NMR spectra of compound <b>11</b>                 | S10 |
| Figure S9. $^1\text{H}$ NMR spectrum of compound <b>12</b>                   | S11 |
| Figure S10. $^{13}\text{C}$ NMR spectra of compound <b>12</b>                | S12 |
| Figure S11. $^1\text{H}$ NMR spectrum of compound <b>11·HCl</b>              | S13 |
| Figure S12. $^{13}\text{C}$ NMR spectra of compound <b>11·HCl</b>            | S14 |
| Figure S13. $^1\text{H}$ NMR spectrum of compound <b>14</b>                  | S15 |
| Figure S14. $^{13}\text{C}$ NMR spectra of compound <b>14</b>                | S16 |
| Figure S15. $^1\text{H}$ NMR spectrum of compound <b>15</b>                  | S17 |
| Figure S16. $^{13}\text{C}$ NMR spectra of compound <b>15</b>                | S18 |
| Figure S17. $\text{IC}_{50}$ of compound <b>11</b> towards amyloglucosidase. | S19 |
| Figure S18. $\text{IC}_{50}$ of compound <b>15</b> towards amyloglucosidase. | S19 |

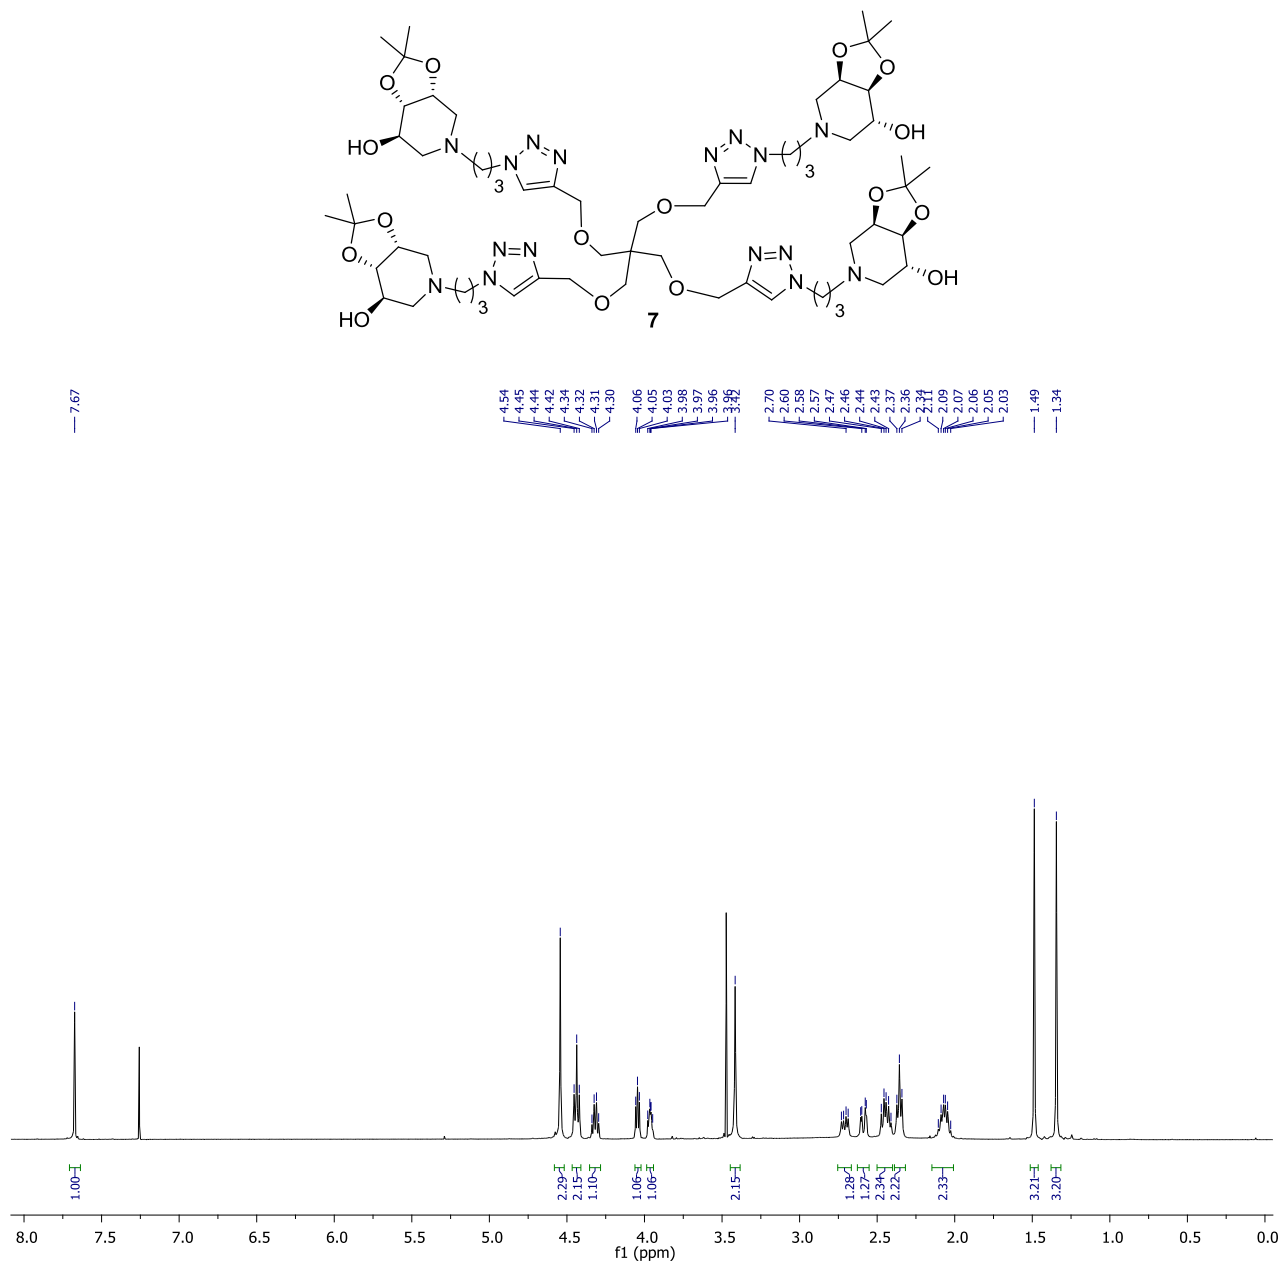

Figure S1:  $^1\text{H}$  NMR spectrum of compound **7** (400 MHz,  $\text{CDCl}_3$ ).

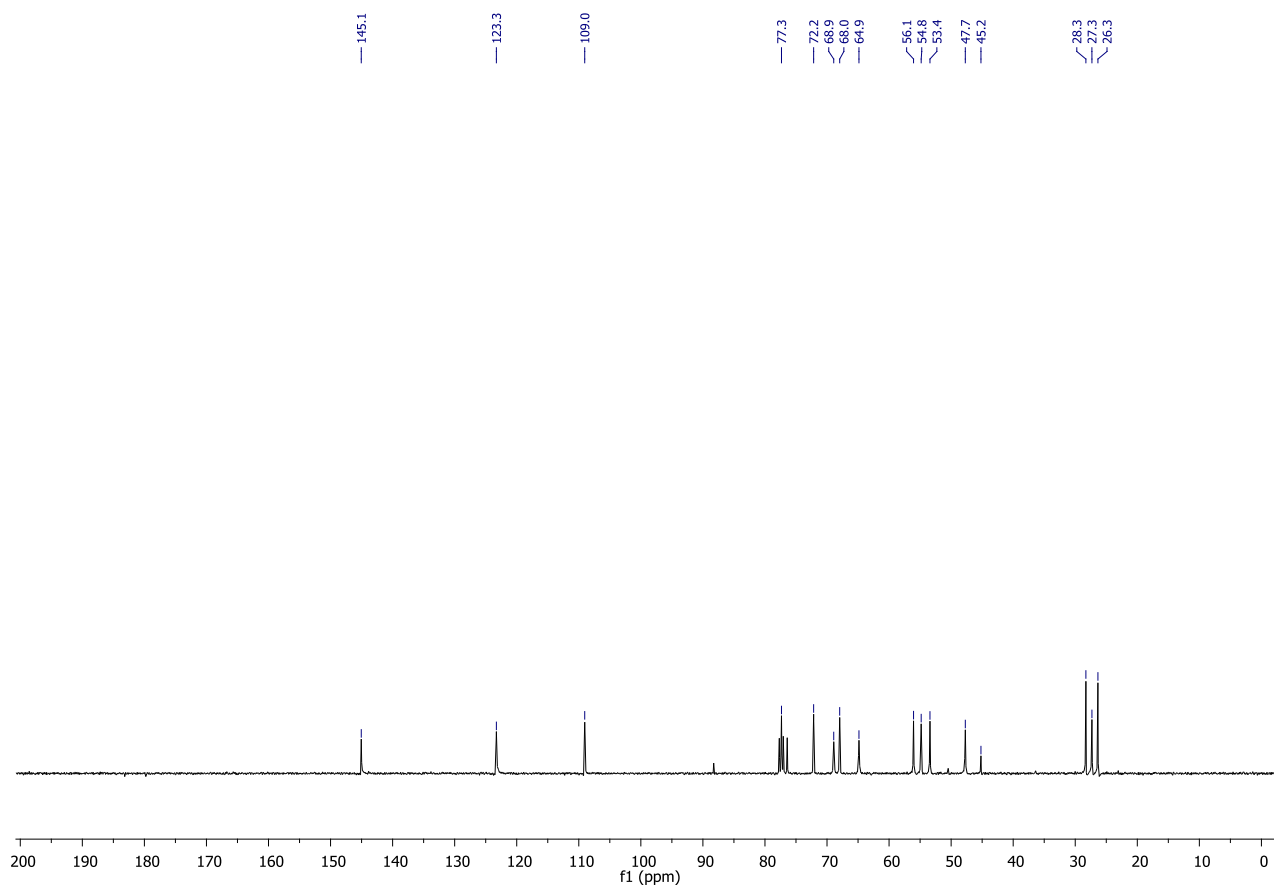

Figure S2:  $^{13}\text{C}$  NMR spectrum of compound **7** (50 MHz,  $\text{CDCl}_3$ ).

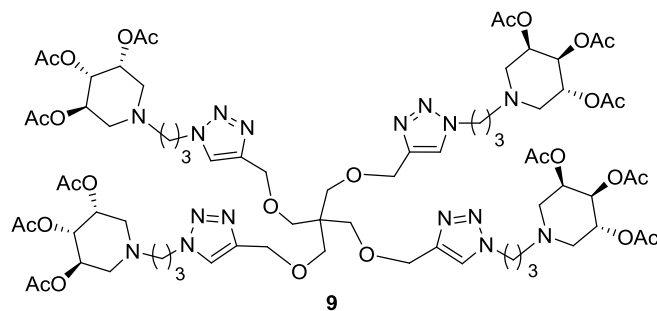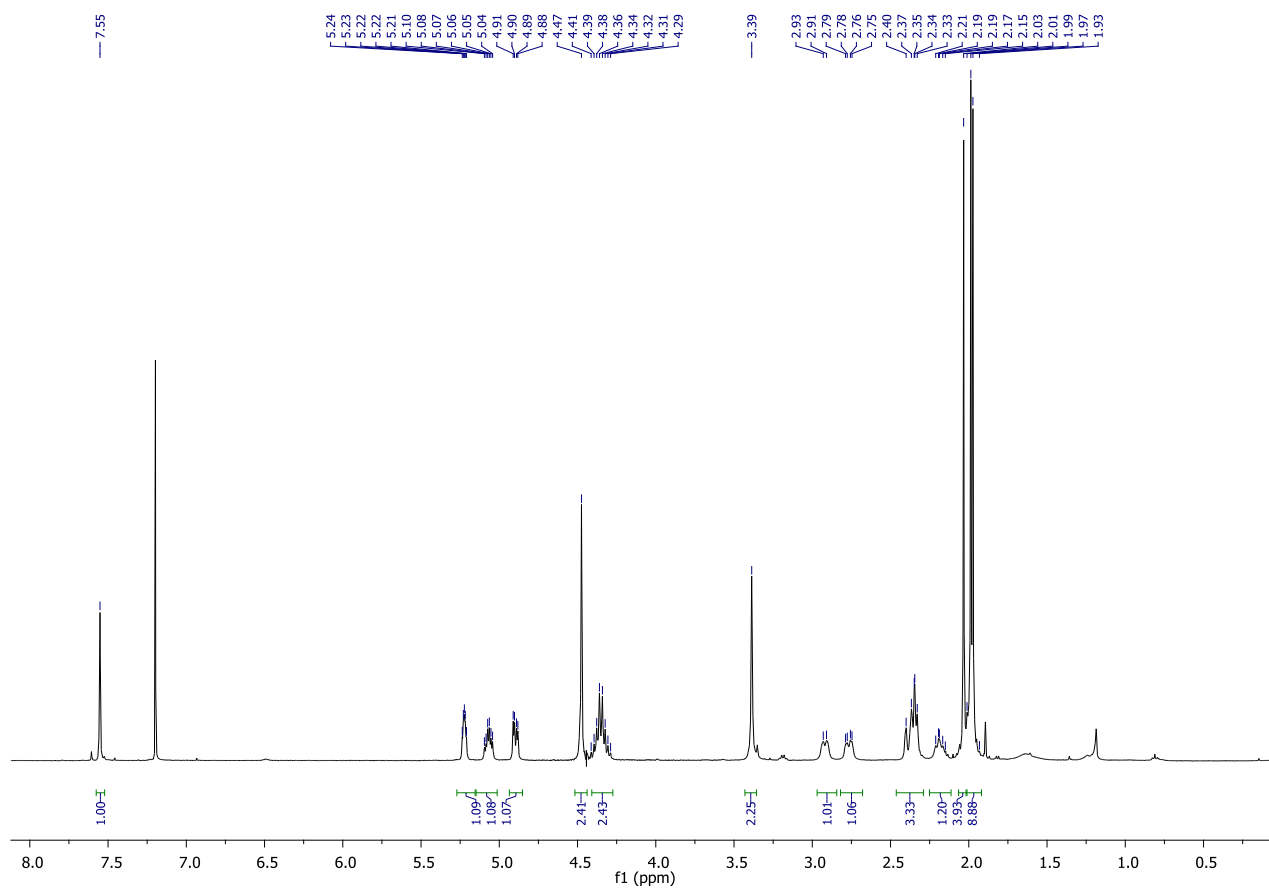

Figure S3:  $^1\text{H}$  NMR spectrum of compound **9** (400 MHz,  $\text{CDCl}_3$ ).

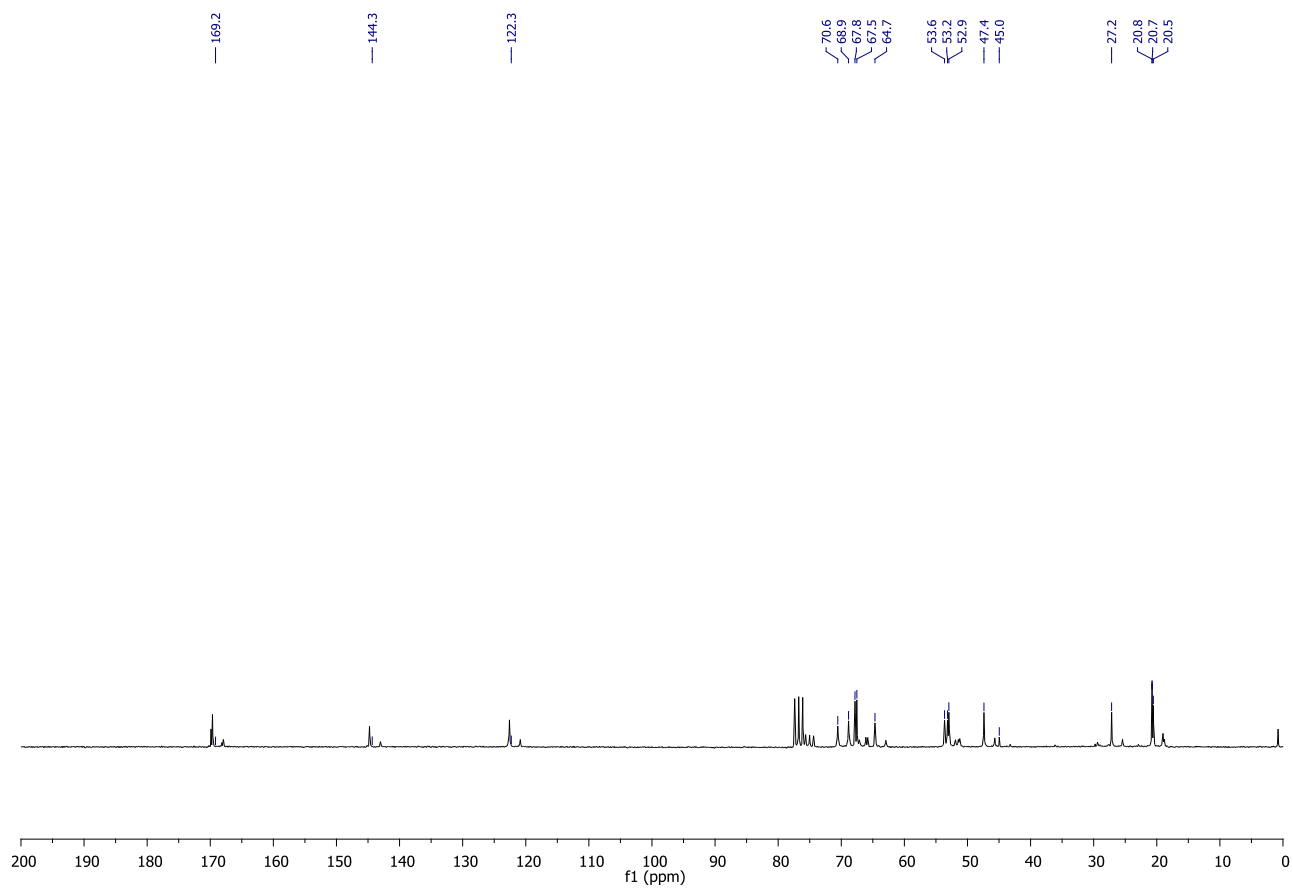

Figure S4:  $^{13}\text{C}$  NMR spectrum of compound **9** (50 MHz,  $\text{CDCl}_3$ ).

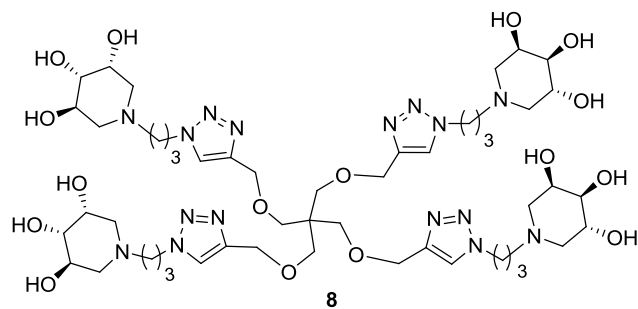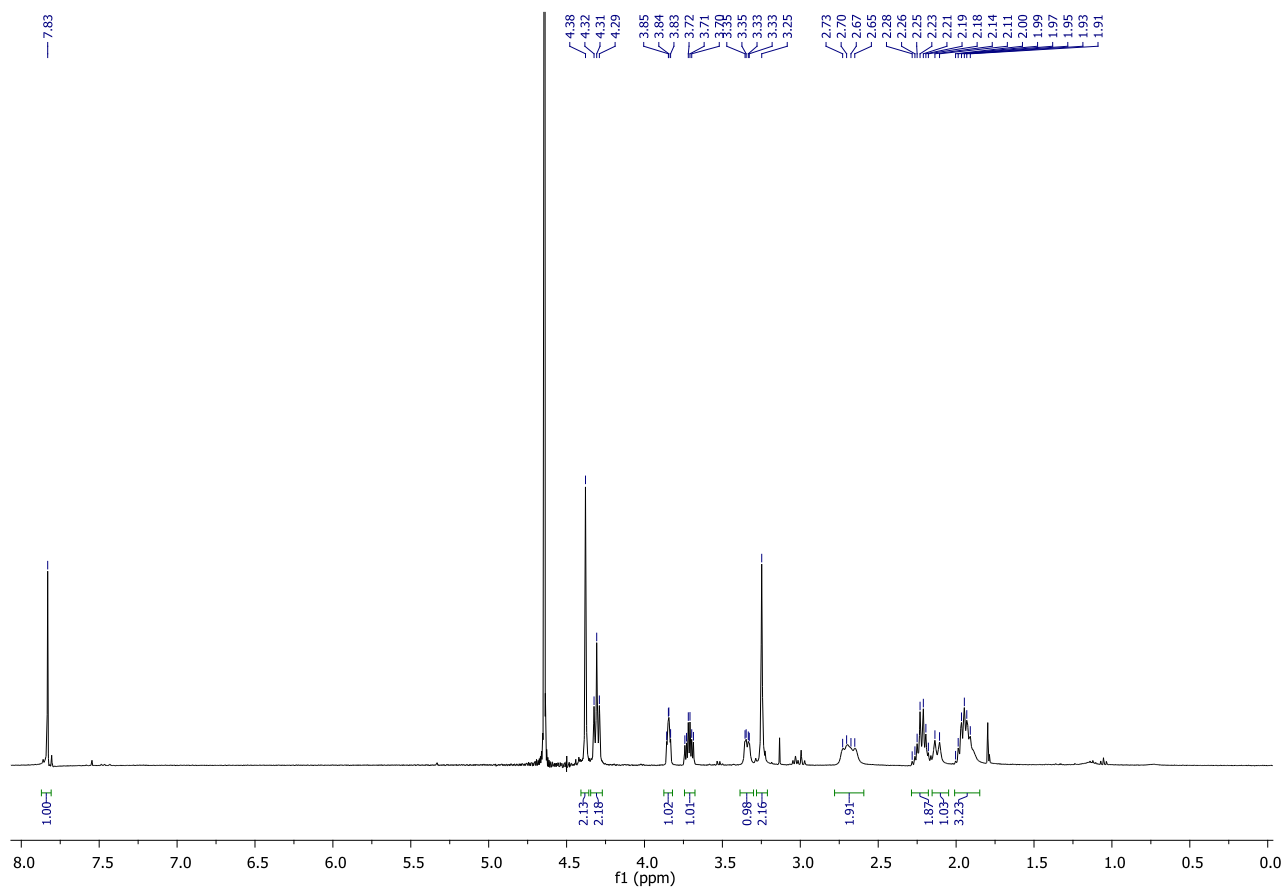

Figure S5:  $^1\text{H}$  NMR spectrum of compound **8** (400 MHz,  $\text{D}_2\text{O}$ ).

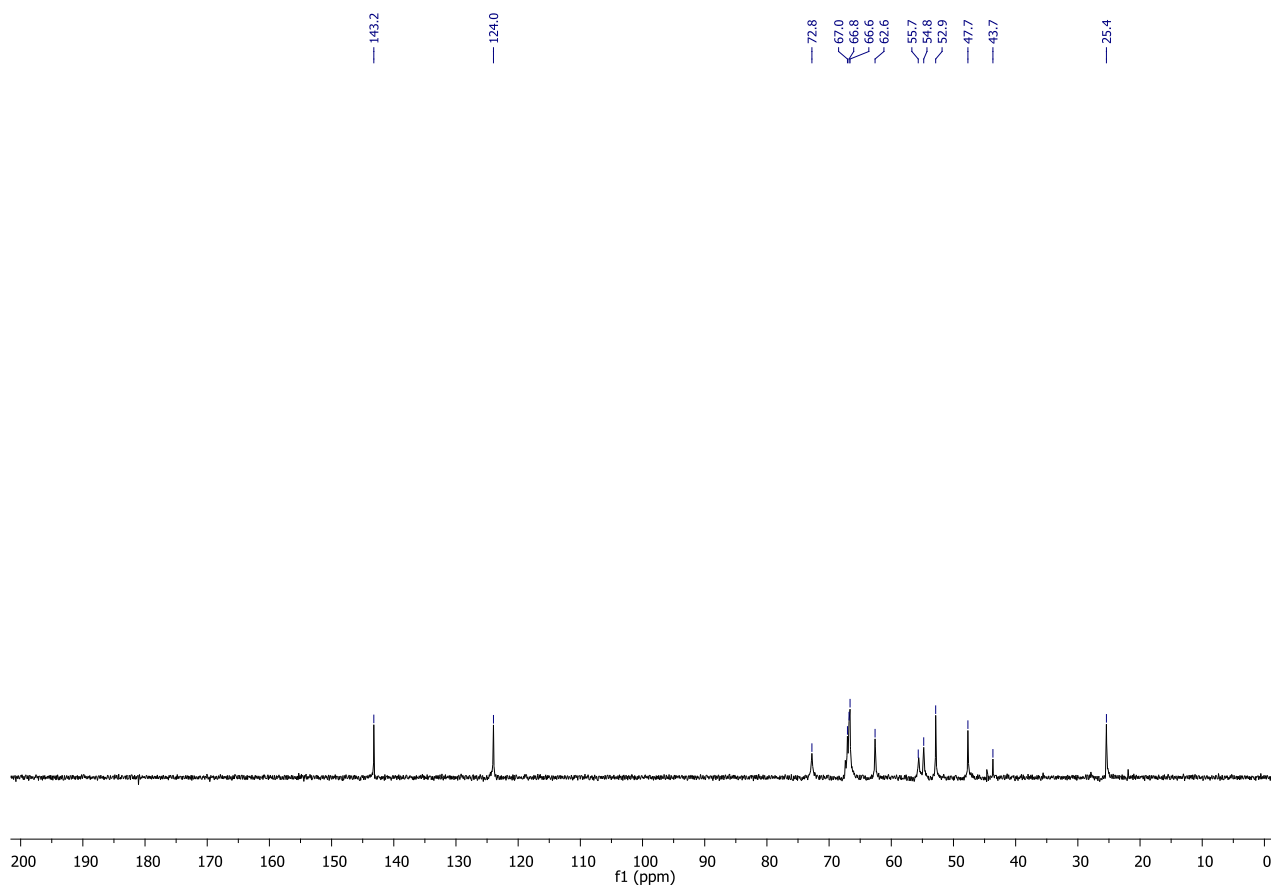

Figure S6:  $^{13}\text{C}$  NMR spectrum of compound **8** (50 MHz,  $\text{D}_2\text{O}$ ).



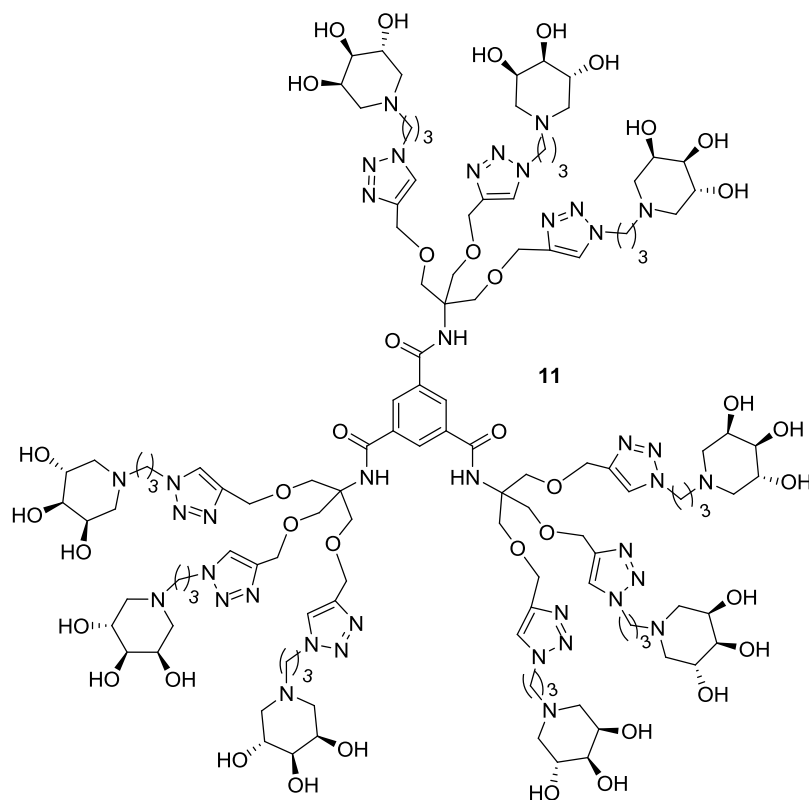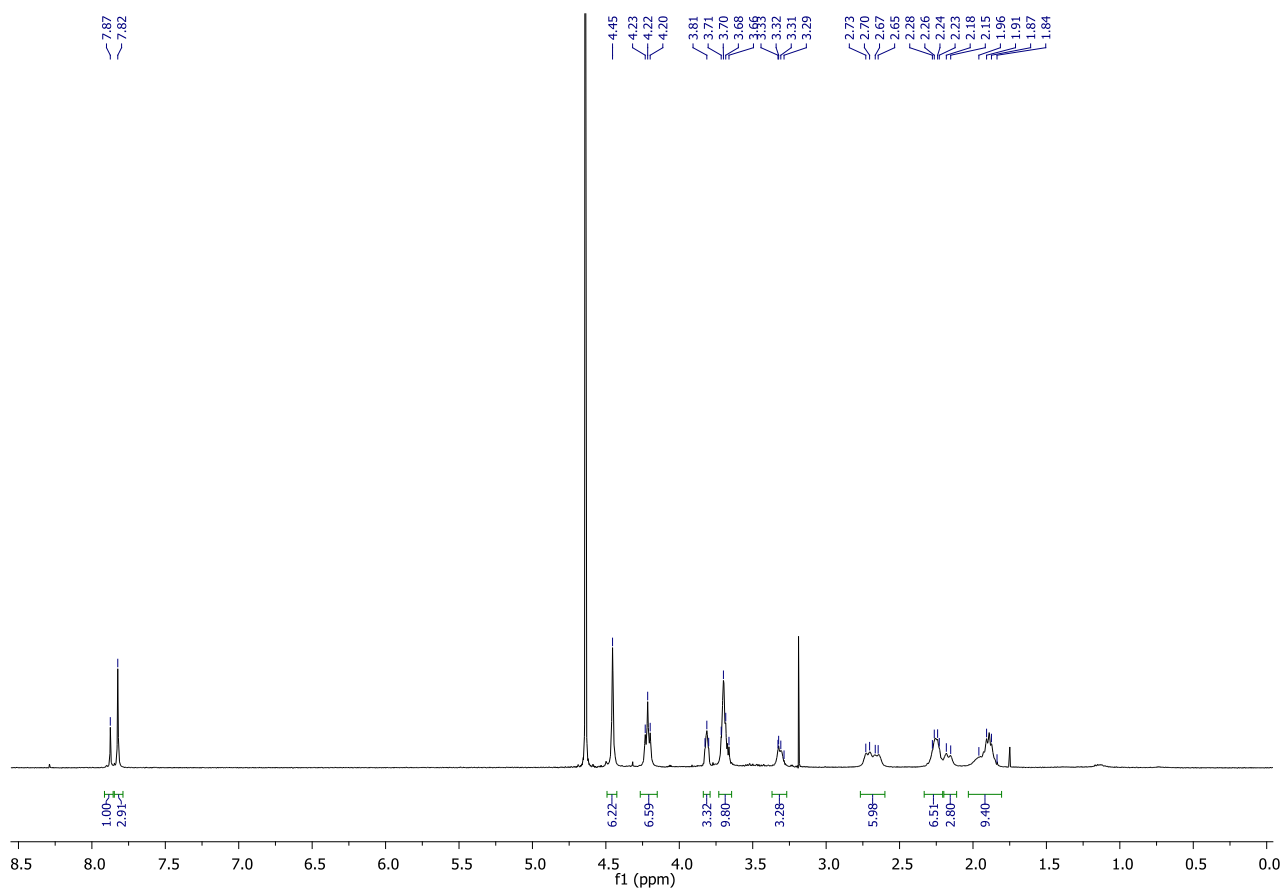

Figure S7:  $^1\text{H}$  NMR spectrum of compound **11** (400 MHz,  $\text{D}_2\text{O}$ ).

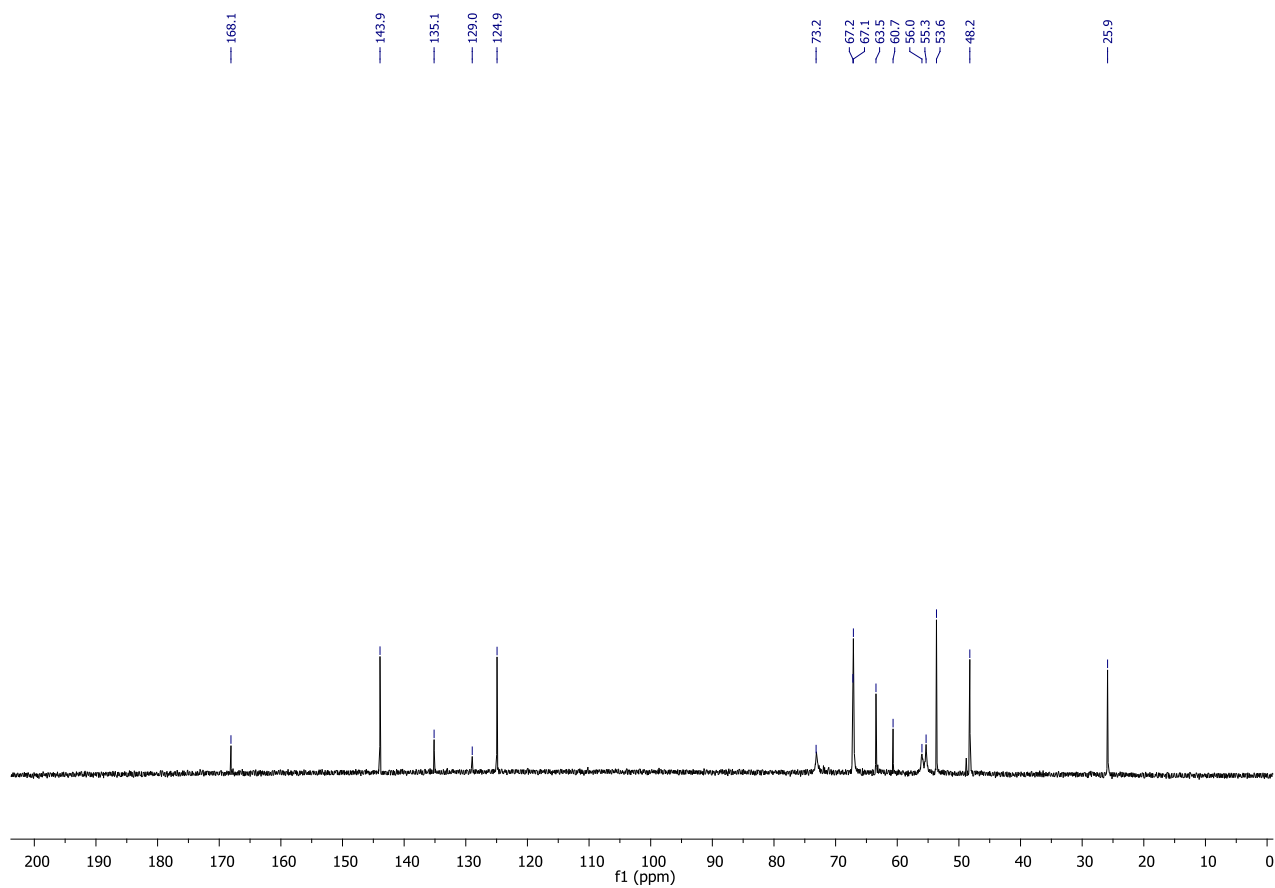

Figure S8:  $^{13}\text{C}$  NMR spectrum of compound **11** (100 MHz,  $\text{D}_2\text{O}$ ).

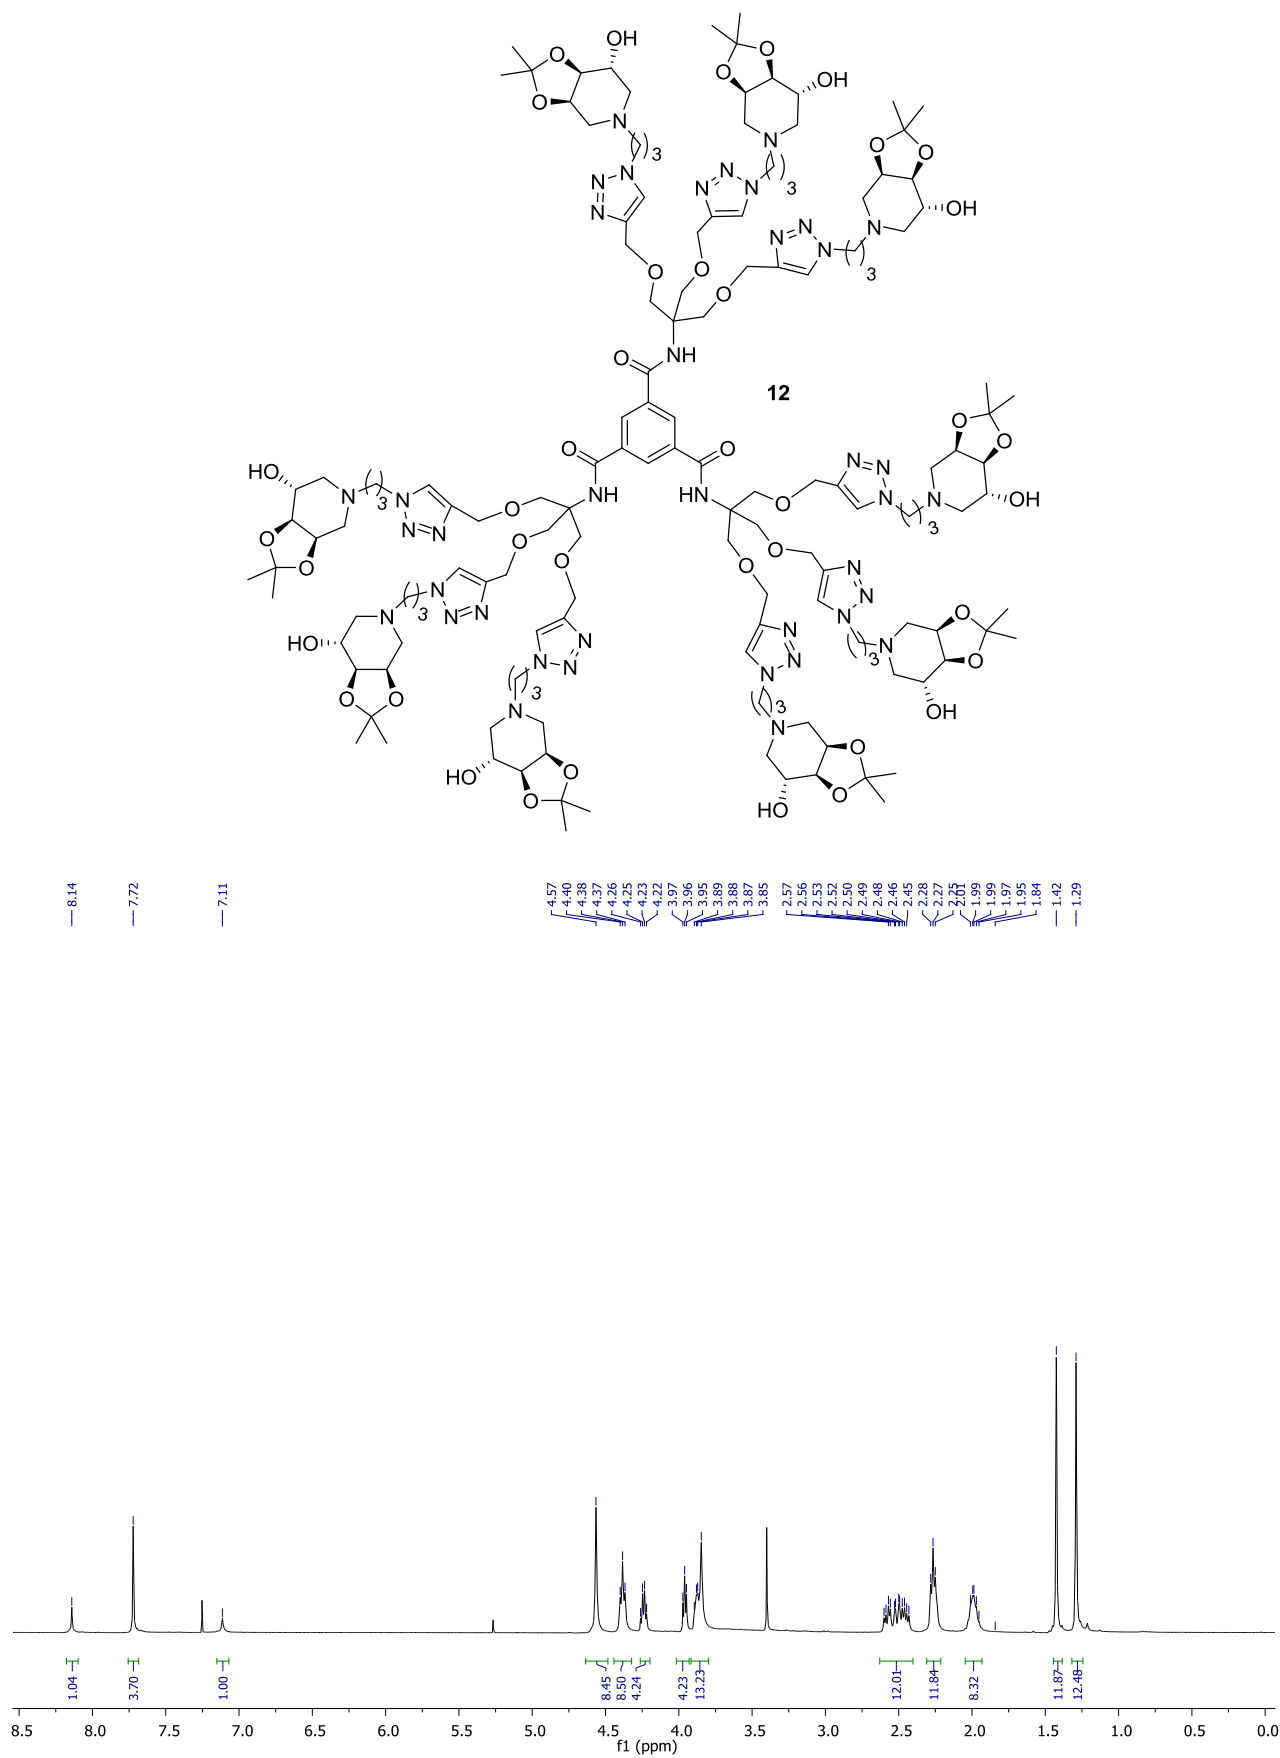

Figure S9:  $^1\text{H}$  NMR spectrum of compound **12** (400 MHz,  $\text{CDCl}_3$ ).

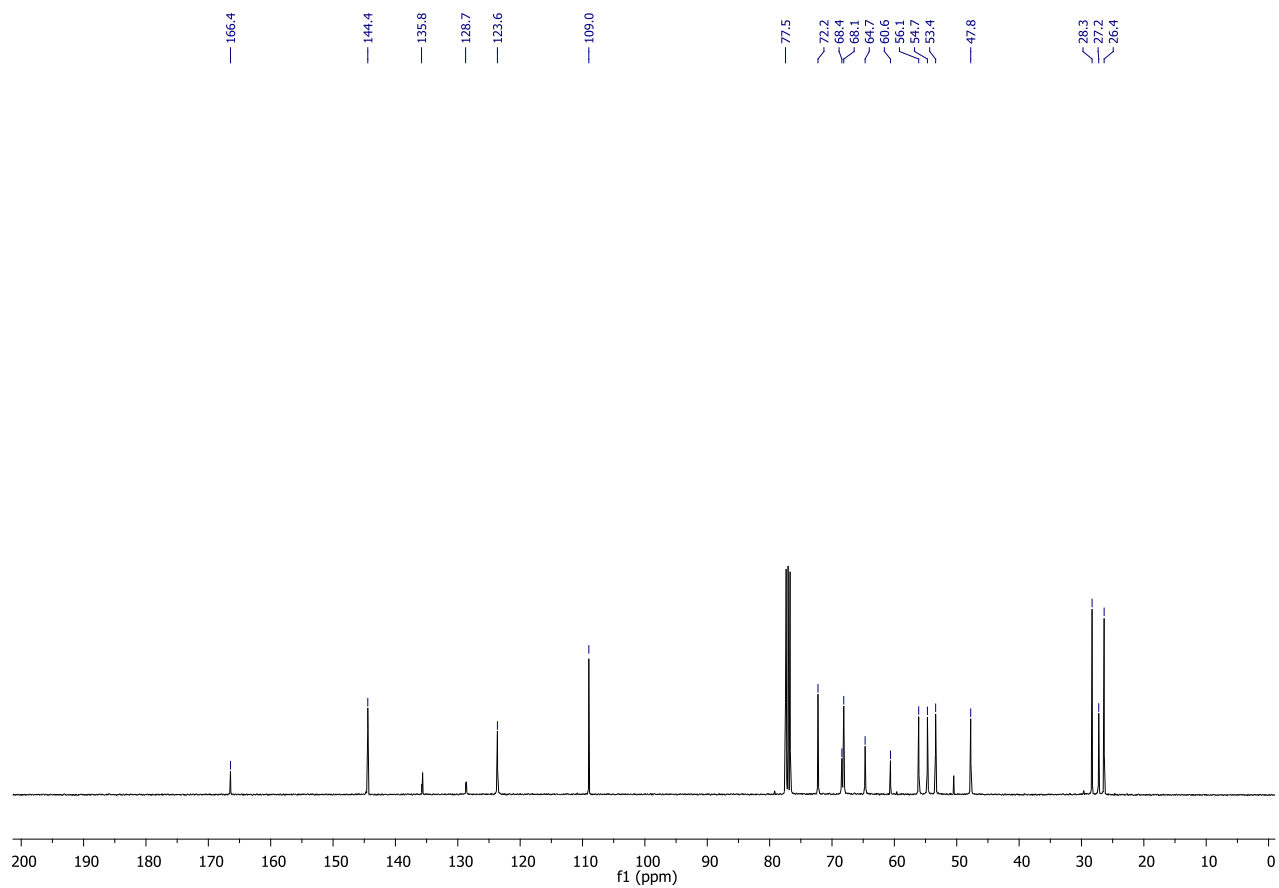

Figure S10:  $^{13}\text{C}$  NMR spectrum of compound **12** (100 MHz,  $\text{CDCl}_3$ ).

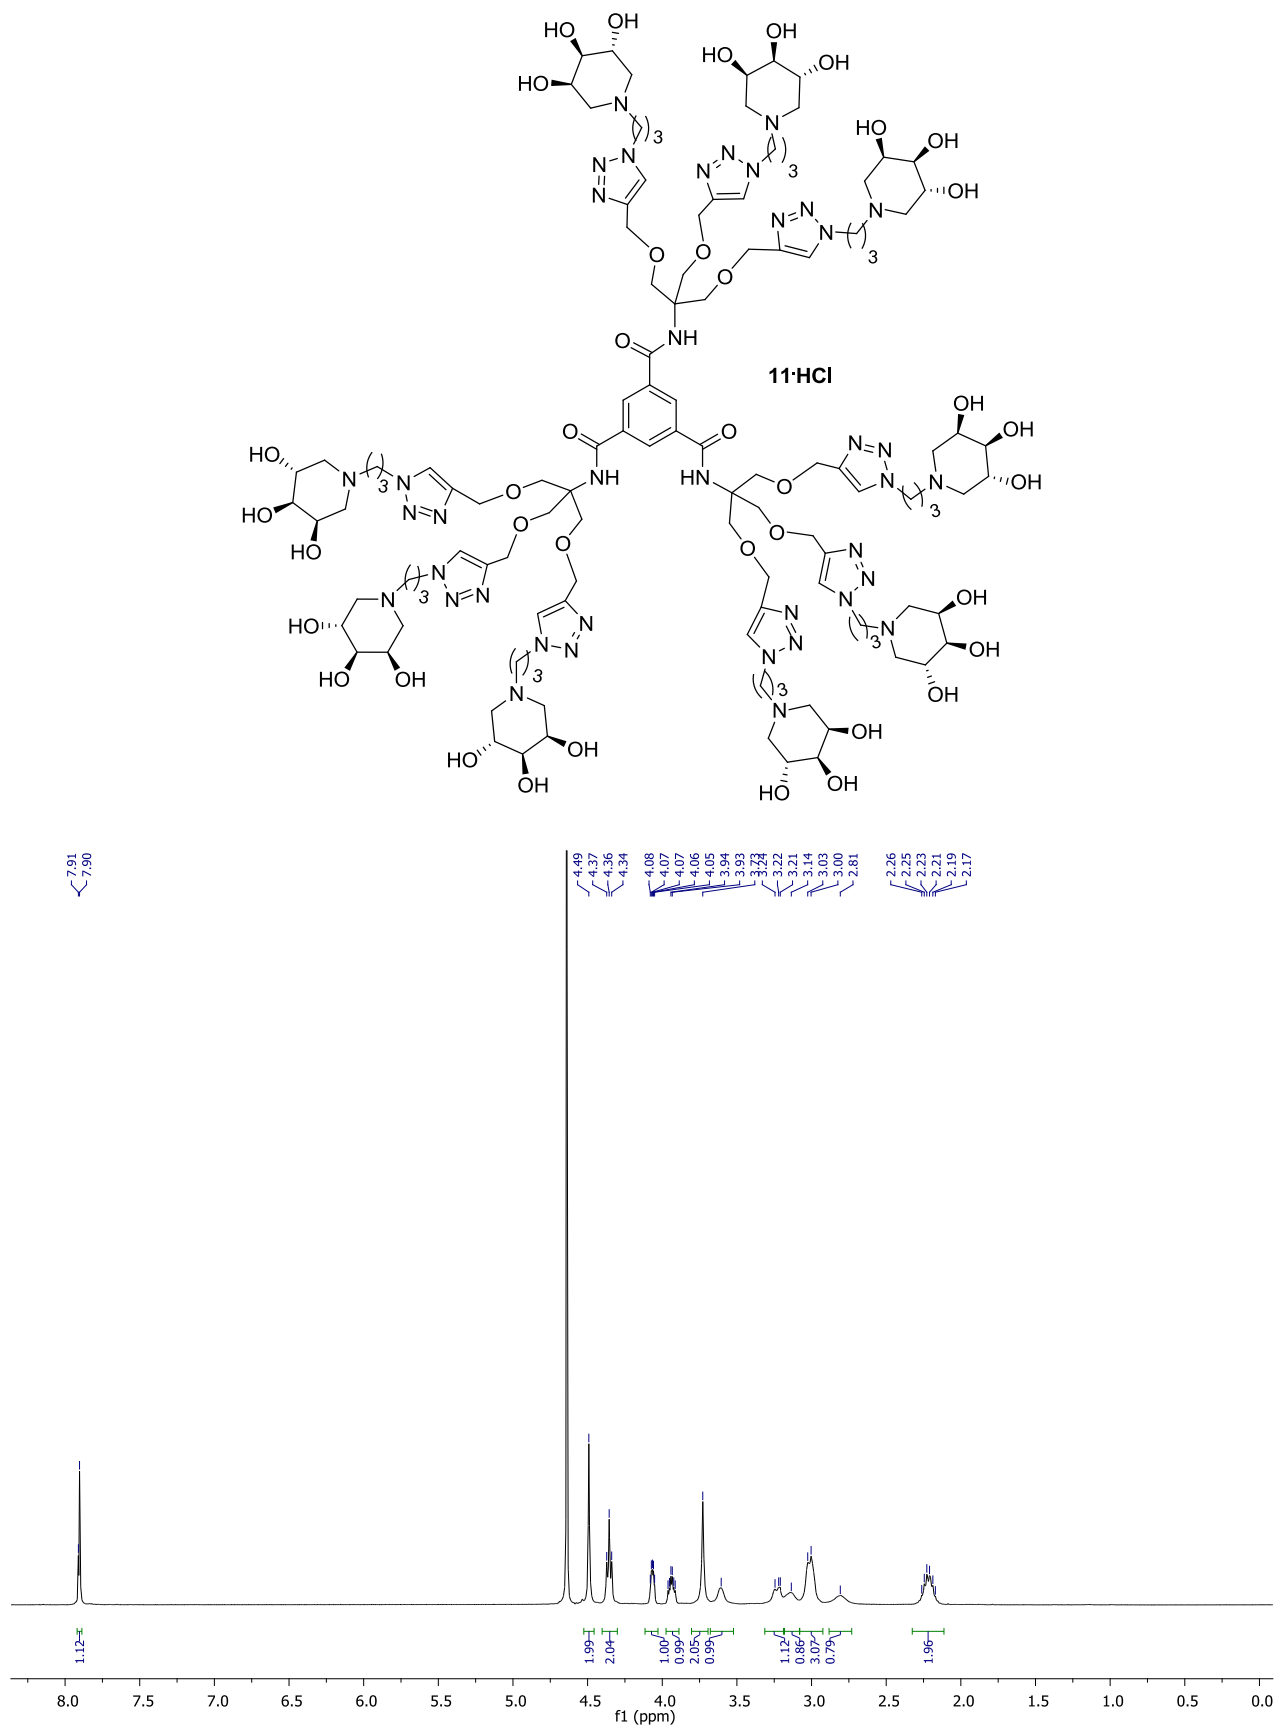

Figure S11:  $^1\text{H}$  NMR spectrum of compound **11·HCl** (400 MHz,  $\text{D}_2\text{O}$ ).

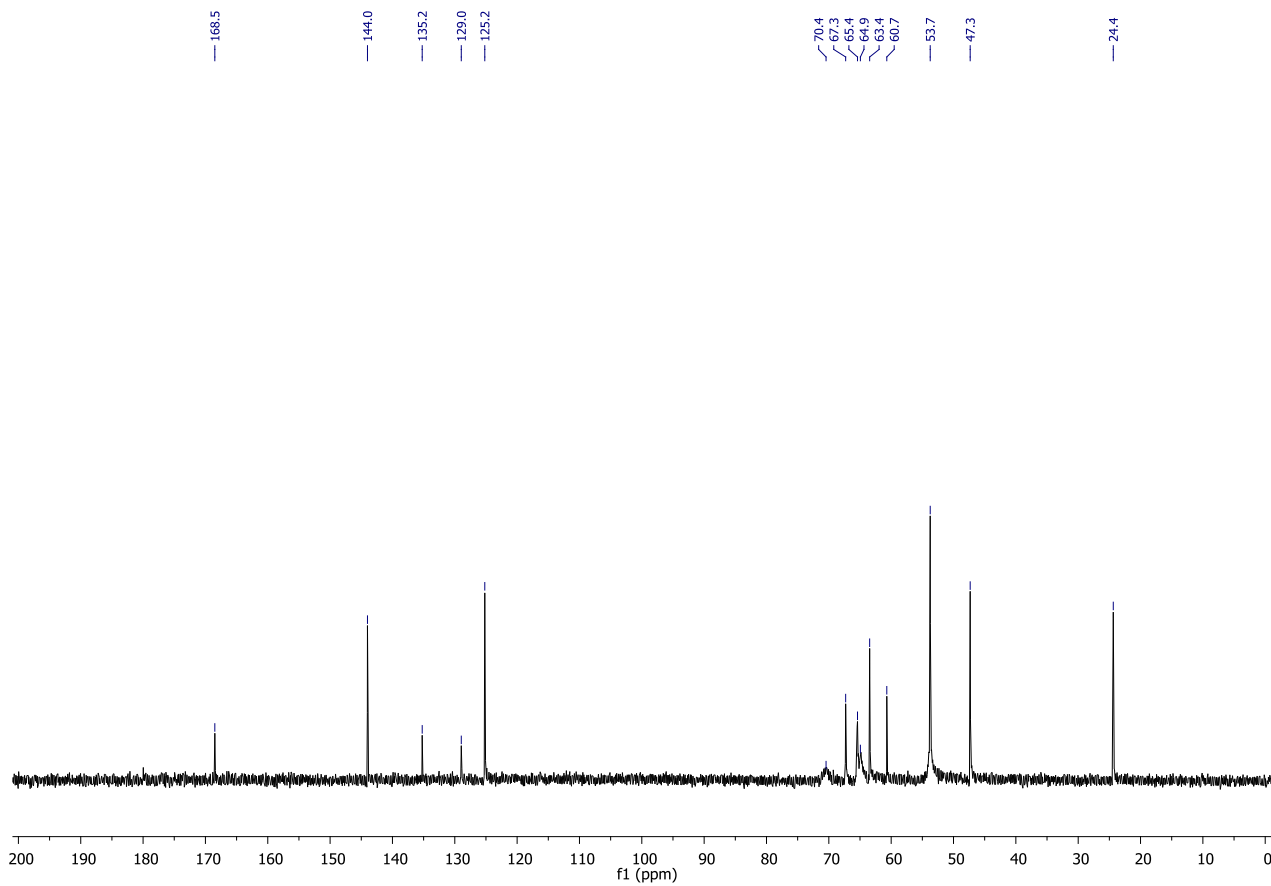

Figure S12:  $^{13}\text{C}$  NMR spectrum of compound **11**-HCl (100 MHz,  $\text{D}_2\text{O}$ ).

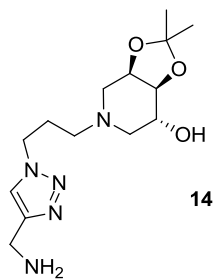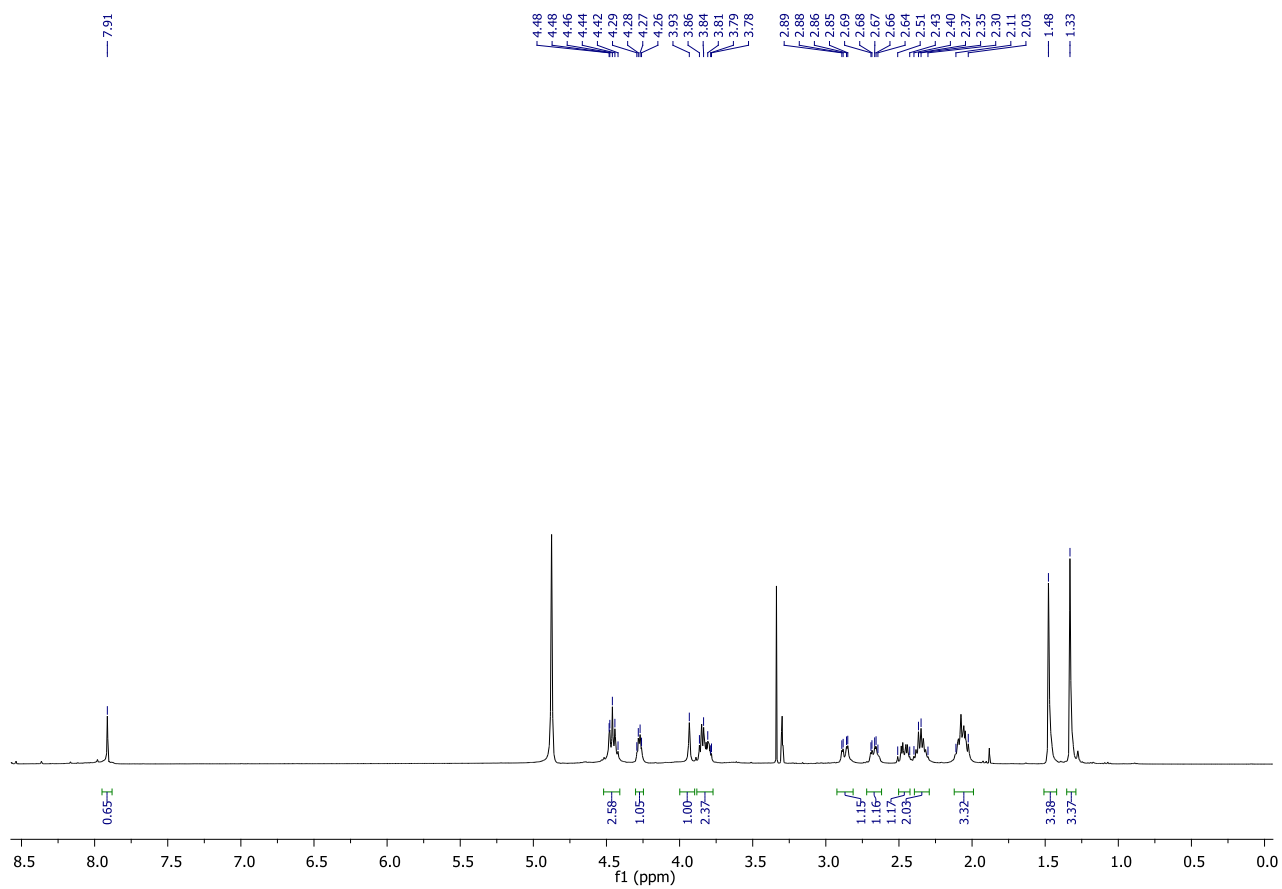

Figure S13:  $^1\text{H}$  NMR spectrum of compound **14** (400 MHz,  $\text{CD}_3\text{OD}$ ).

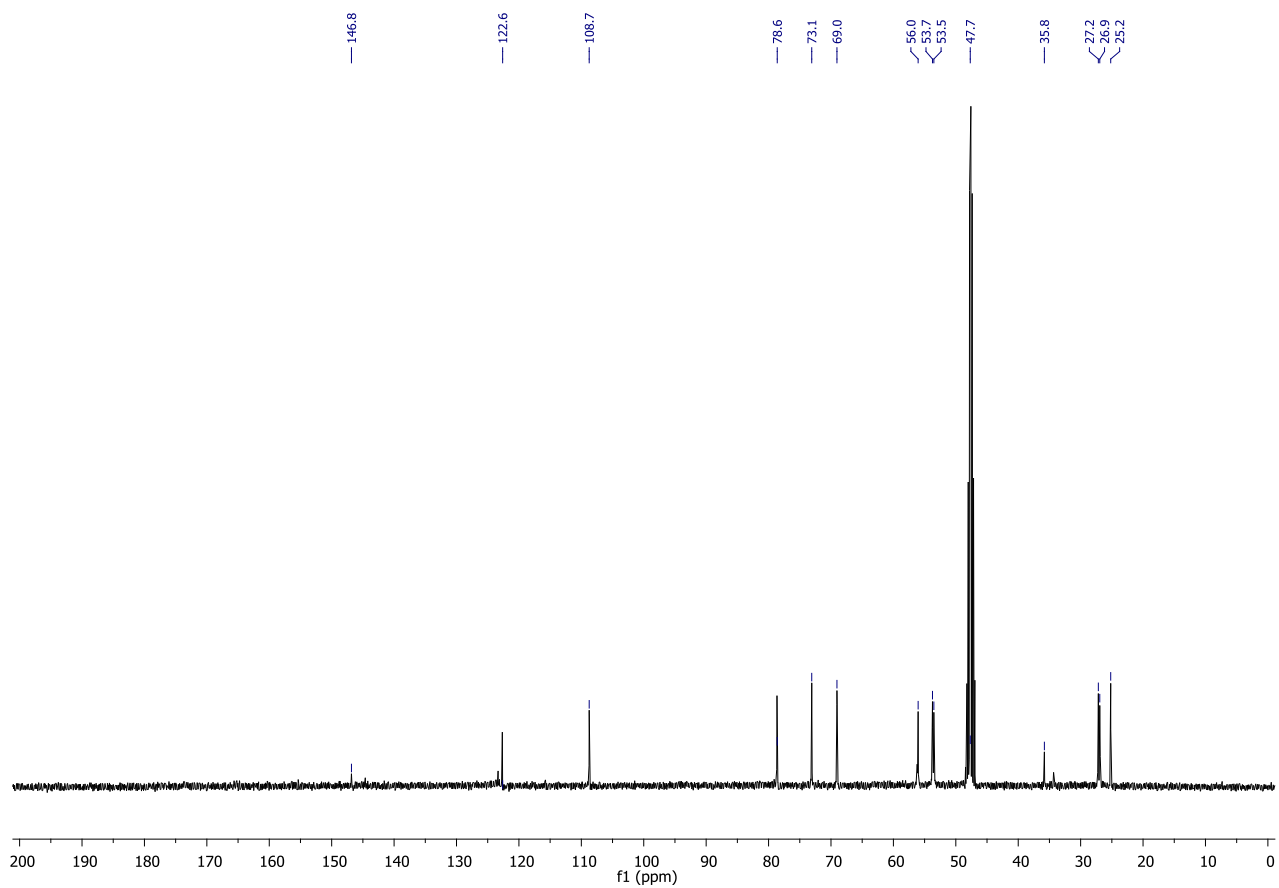

Figure S14:  $^{13}\text{C}$  NMR spectrum of compound **14** (100 MHz,  $\text{CD}_3\text{OD}$ ).



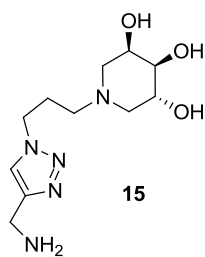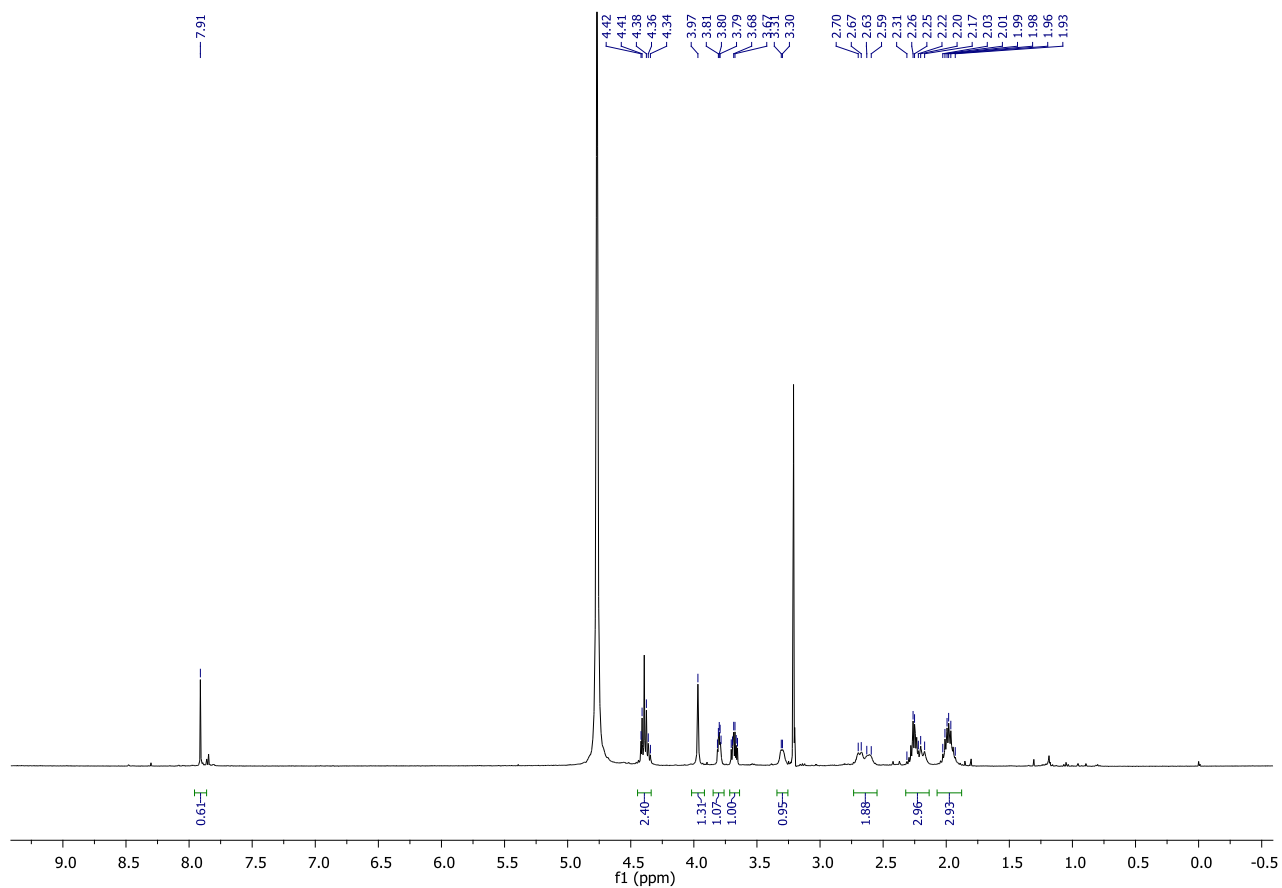

Figure S15:  $^1\text{H}$  NMR spectrum of compound **15** (400 MHz,  $\text{CD}_3\text{OD}$ ).

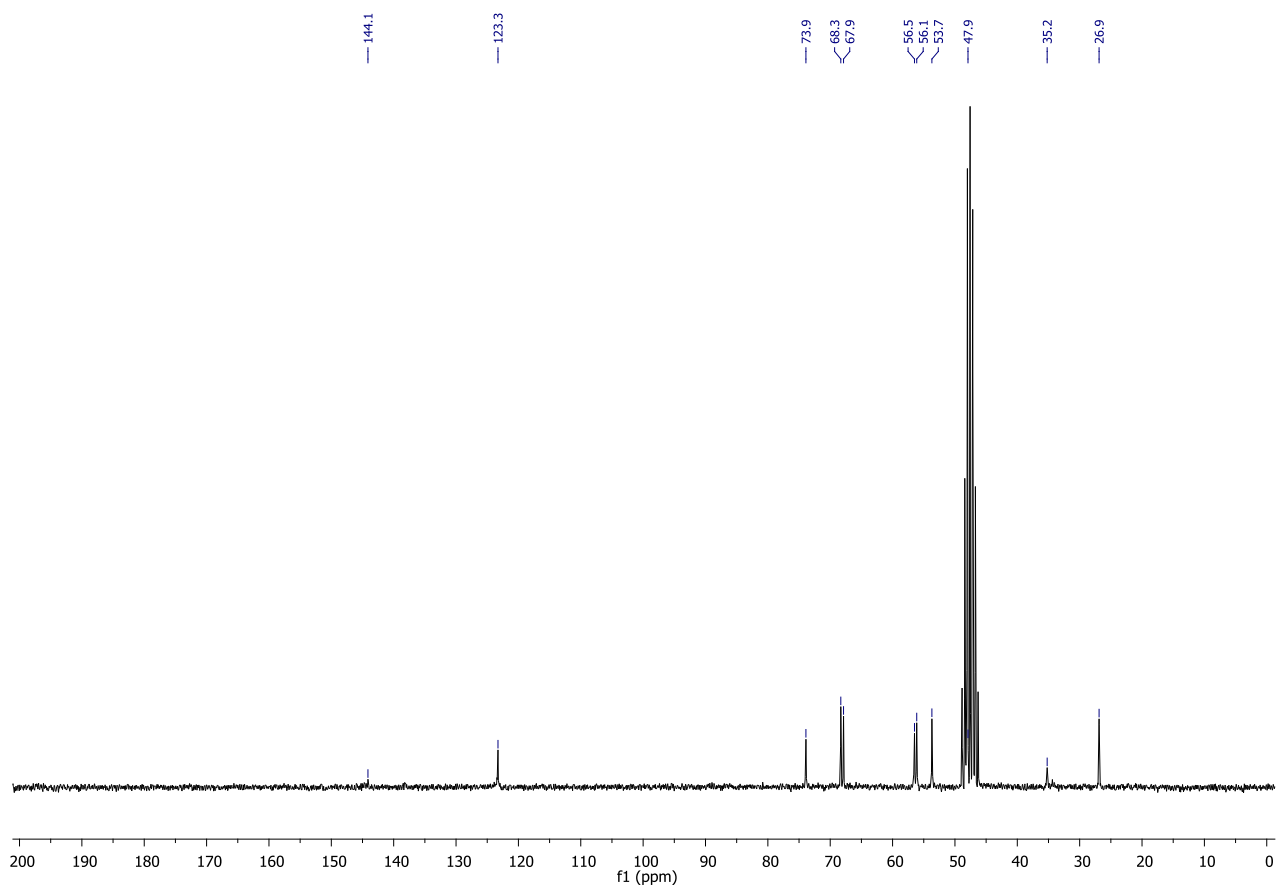

Figure S16:  $^{13}\text{C}$  NMR spectrum of compound **15** (50 MHz,  $\text{CD}_3\text{OD}$ ).

## Glycosidase inhibition assays

The experiments were performed essentially as previously described.<sup>1</sup> Briefly, 0.01–0.5 units/mL of enzyme and inhibitor were pre-incubated for 5 min at rt, and the reaction started by addition of the substrate, buffered to the optimal pH of the enzyme. After 20 min of incubation at 37 °C, the reaction was stopped by addition of sodium borate buffer pH 9.8. The *p*-nitrophenolate formed was measured by visible absorption spectroscopy at 405 nm.

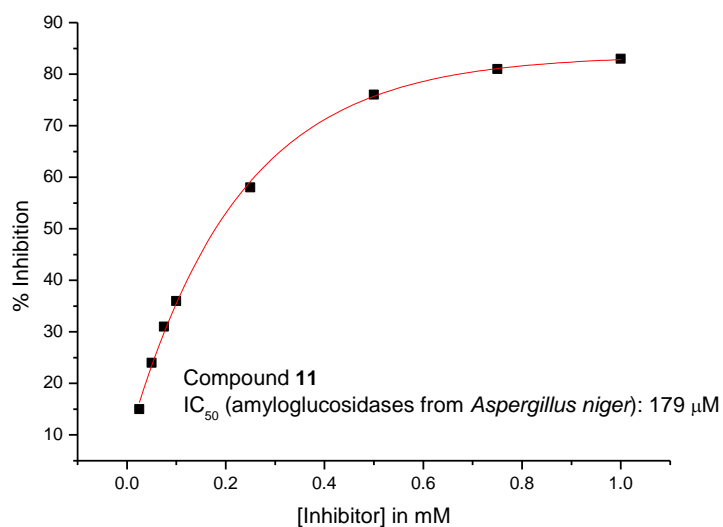

Figure S17: IC<sub>50</sub> of compound **11** towards amyloglucosidase.

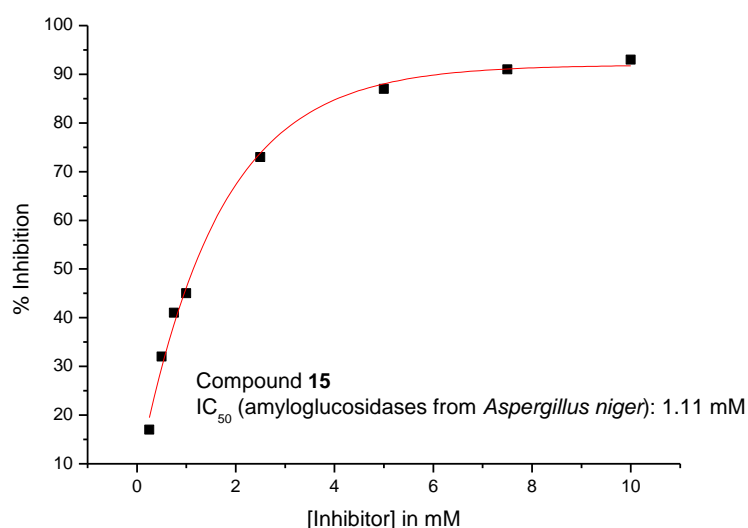

Figure S18: IC<sub>50</sub> of compound **15** towards amyloglucosidase.

<sup>1</sup> (a) Saul, R.; Chambers, J. P.; Molyneux, R. J.; Elbein, A. D. *Arch. Biochem. Biophys.* **1983**, *221*, 593–597; (b) Brandi, A.; Cicchi, S.; Cordero, F. M.; Frignoli, R.; Goti, A.; Picasso, S.; Vogel, P. *J. Org. Chem.* **1995**, *60*, 6806–6812.
